# Supplementary material for: Inorganic Salts and Dehydrating Agents Cooperatively Promoted Ru-Catalyzed Ethylene Methoxycarbonylation Using CO2 as a CO Surrogate
Source: MDPI journal article supplement (doi:10.3390/catal12080826), 2022-07-27
Supplement: s1 [file s1]

## **Supporting Information**

**Inorganic Salts and Tasked Ionic Liquid Multi-Cooperatively Promoted Ru-Catalyzed  
Ethylene Methoxycarbonylation Using CO<sub>2</sub> as a CO Surrogate**

Meijiao Qi, Tianli Dong, Yu Kang, Li Zhang, Zhongyu Duan, Binyuan Liu\*

## Contents

1. IR spectra of a mixture of  $\text{Ru}_3(\text{CO})_{12}$  and 2-CP
2.  $^{29}\text{Si}$  NMR spectrum of the reaction mixture
3.  $^1\text{H}$  NMR spectrum of  $[\text{TmsPmim}]\text{Cl}$
4.  $^1\text{H}$  NMR spectrum of  $\text{BmimMgCl}_3$
5. ESI-MS spectra of  $\text{BmimMgCl}_3$

1. IR spectra of a mixture of  $\text{Ru}_3(\text{CO})_{12}$  and 2-CP.

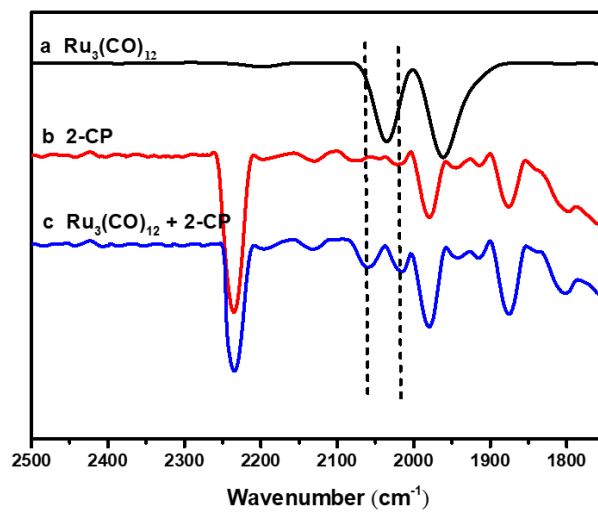

Figure S1. IR spectra of a mixture of  $\text{Ru}_3(\text{CO})_{12}$  and 2-CP.

2.  $^{29}\text{Si}$  NMR spectrum of the reaction mixture

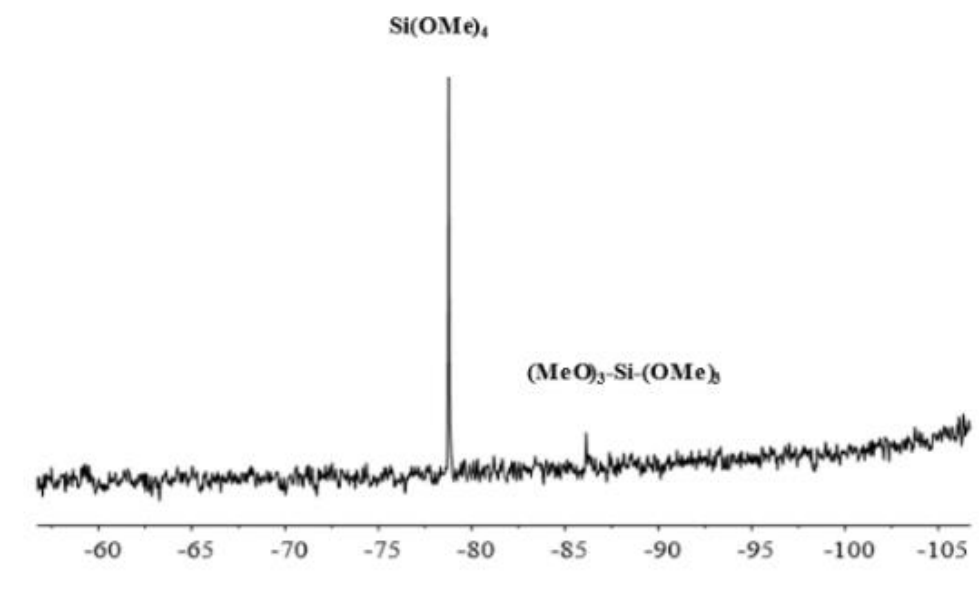

Figure S2  $^{29}\text{Si}$  NMR spectrum of the reaction mixture

3.  $^1\text{H}$  NMR spectrum of  $[\text{TmsPmim}]\text{Cl}$

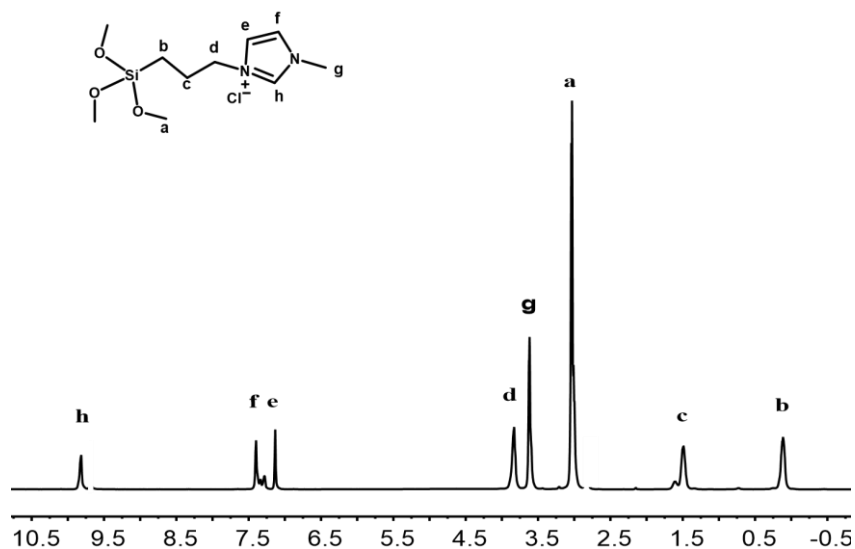

Figure S3.  $^1\text{H}$  NMR spectrum of  $[\text{TmsPmim}]\text{Cl}$

4.  $^1\text{H}$  NMR spectrum of  $\text{BmimMgCl}_3$

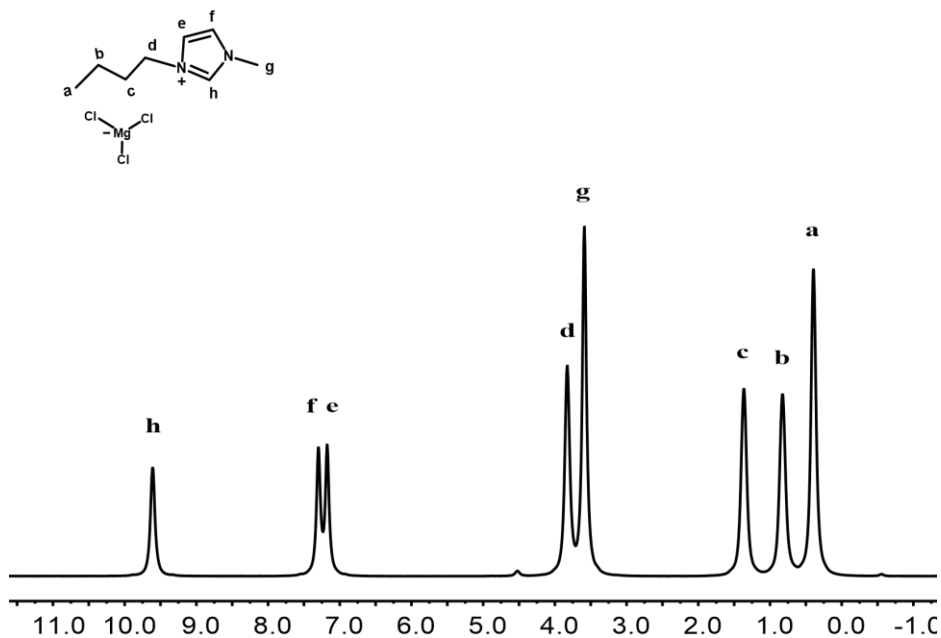

Figure S4.  $^1\text{H}$  NMR spectrum of  $\text{BmimMgCl}_3$

## 5. ESI-MS spectra of BmimMgCl<sub>3</sub>

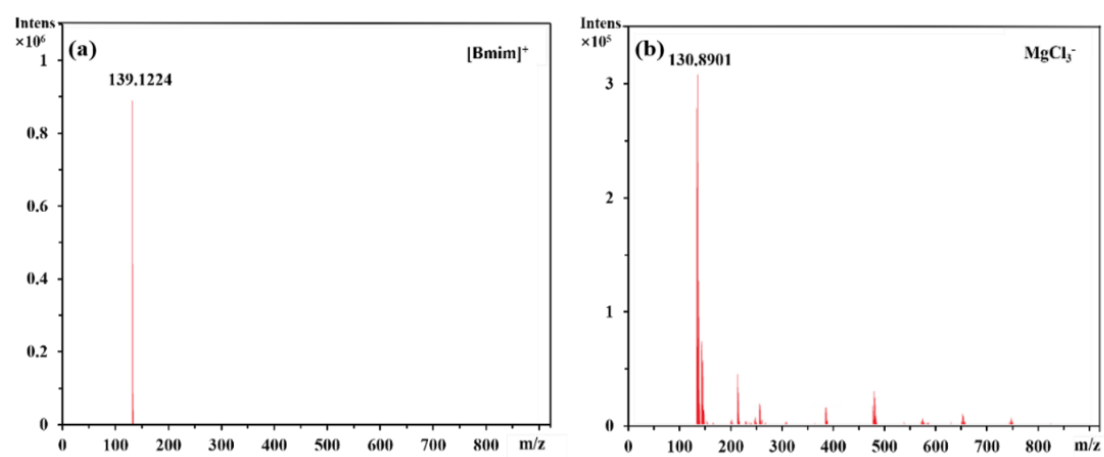

**Figure S5.** ESI-MS spectrum of BmimMgCl<sub>3</sub>
